# Supplementary material
Source: PubMed Central journal article supplement (PMC3725818)
Supplement: NIHMS354428-supplement-01.pdf [file NIHMS354428-supplement-01.pdf]

**Table S1:**

Primers used in the present study to amplify the complete mt genome of PNG and Indian *W. bancrofti* isolate. Numbers assigned to primer sets represent the first position to which the forward primer was predicted to anneal. F and R designations that appear in the primer names indicate transcription in the forward and reverse directions, respectively.

| Primer name | Primer sequence (5'-3') |
|-------------|-------------------------|
| 41F         | TCGATTAAAAGATTGTATATTAT |
| 41R         | CATCAACATCTCCAAACTAA    |
| 701F        | TTAATTTTGTAGTTTGGAGAT   |
| 701R        | AATAGAAGAATAAGCAGCCA    |
| 1751F       | TGTAAGTCTTTGGCTGCTT     |
| 1751R       | AATACCAACGGTATGTAAAC    |
| 2721F       | TTTGGATGTTATAATTTTAGG   |
| 2721R       | TCAATCATTAAATAATTAATAAT |
| 3691F       | GTTACTTTTATTGGTTTTATATT |
| 3691R       | CATACTACCAAATTCACA      |
| 4651F       | GCTAGATTTACTTTAAGTTATA  |
| 4651R       | GATAATGACCAGCCCAAG      |
| 5611F       | CAATAACTATCAAGTTATGATA  |
| 5611R       | ATTCTAAAAATCGTCAATAATC  |
| 6425F       | GTAGTAAATTACATAATTTTAA  |
| 6425R       | GGATACTAATCCAGTTCA      |
| 7441F       | GATTTTGGTTTTGGTTGTATT   |
| 7441R       | CTAAAAATCCCAGATAATATAA  |
| 8461F       | TGGGTGTTTCTGTATATTTTA   |
| 8461R       | GATACGTAAAGTCAAAGCAA    |
| 9441F       | GAGTTTTTTGATGAGTGGTG    |
| 9441R       | AACTCTAAAGCAATAGGTATAA  |
| 10421F      | TTTGTGGTGCTAATCATAGTT   |
| 10421R      | AACAAGATAAACCGCTCTGT    |
| 11420F      | ATTGAACTTAATATTAGTTTAG  |
| 11420R      | ATCAAACCACCCATACTC      |
| 12381F      | TATTTACGGTTCTTTTTATATG  |
| 12381R      | CCTTACTACAACAACCACTA    |
| 13119F      | GGTAGTCAGGATTATCGTG     |
| 13119R      | CGAGTTAAACCCAAAATTAG    |

**Table S2:**Codon usage (%) reported for the 12 mitochondrial protein-coding genes - PNG *W. bancrofti* isolate

| aa        | Codon | N   | %    | aa        | Codon | N   | %   | aa   | Codon | N   | %   | aa        | Codon | N   | %   |     |     |
|-----------|-------|-----|------|-----------|-------|-----|-----|------|-------|-----|-----|-----------|-------|-----|-----|-----|-----|
| Phe       | TTT   | 619 | 17.9 | Ser (UCN) | TCT   | 159 | 4.6 | Tyr  | TAT   | 214 | 6.2 | Cys       | TGT   | 101 | 2.9 |     |     |
|           | TTC   | 19  | 0.5  |           |       | TCC | 4   | 0.1  |       | TAC | 13  | 0.4       |       | TGC | 2   | 0.1 |     |
| Leu (UUR) | TTA   | 171 | 4.9  |           | TCA   | 6   | 0.2 | Stop | TAA   | 5   | 0.1 | Trp       | TGA   | 31  | 0.9 |     |     |
|           | TTG   | 247 | 7.1  |           | TCG   | 2   | 0.1 | Stop | TAG   | 2   | 0.1 |           | TGG   | 42  | 1.2 |     |     |
| Leu (CUN) | CTT   | 30  | 0.9  | Pro       | CCT   | 64  | 1.9 | His  | CAT   | 48  | 1.4 | Arg       | CGT   | 46  | 1.3 |     |     |
|           | CTC   | 0   | 0.0  |           |       | CCC | 1   | 0.0  |       | CAC | 4   |           | 0.1   |     | CGC | 0   | 0.0 |
|           | CTA   | 5   | 0.1  |           |       | CCA | 7   | 0.2  | Gln   | CAA | 19  |           | 0.5   |     | CGA | 3   | 0.1 |
|           | CTG   | 5   | 0.1  |           |       | CCG | 3   | 0.1  |       | CAG | 33  |           | 1.0   |     | CGG | 6   | 0.2 |
| Ile       | ATT   | 185 | 5.4  | Thr       | ACT   | 82  | 2.4 | Asn  | AAT   | 98  | 2.8 | Ser (AGN) | AGT   | 121 | 3.5 |     |     |
|           | ATC   | 12  | 0.3  |           |       | ACC | 4   | 0.1  |       | AAC | 7   |           | 0.2   |     | AGC | 3   | 0.1 |
| Met       | ATA   | 59  | 1.7  |           | ACA   | 1   | 0.0 | Lys  | AAA   | 19  | 0.5 |           | AGA   | 17  | 0.5 |     |     |
|           | ATG   | 90  | 2.6  |           | ACG   | 0   | 0.0 |      | AAG   | 51  | 1.5 |           | AGG   | 17  | 0.5 |     |     |
| Val       | GTT   | 272 | 7.9  | Ala       | GCT   | 72  | 2.1 | Asp  | GAT   | 79  | 2.3 | Gly       | GGT   | 176 | 5.1 |     |     |
|           | GTC   | 6   | 0.2  |           |       | GCC | 6   | 0.2  |       | GAC | 5   |           | 0.1   |     | GGC | 12  | 0.3 |
|           | GTA   | 25  | 0.7  |           |       | GCA | 2   | 0.1  | Glu   | GAA | 22  |           | 0.6   |     | GGA | 20  | 0.6 |
|           | GTG   | 19  | 0.5  |           |       | GCG | 1   | 0.0  |       | GAG | 38  |           | 1.1   |     | GGG | 25  | 0.7 |

**Table S3:**Nucleotide composition (%) of PNG *W. bancrofti* isolate mt genome subsets

| mt genome subset     | No. of nt | A    | C    | G    | T    | A+T  |
|----------------------|-----------|------|------|------|------|------|
| Entire sequence      | 13,637    | 20.1 | 7.2  | 18.1 | 54.5 | 74.6 |
| Protein-coding genes | 10,377    | 17.7 | 7.5  | 19.1 | 55.7 | 73.4 |
| Codon position       | 1st       | 22.2 | 7.9  | 22.6 | 47.3 | 69.5 |
|                      | 2nd       | 19.0 | 12.0 | 18.0 | 51.0 | 70.0 |
|                      | 3rd       | 11.9 | 2.8  | 16.8 | 68.5 | 80.4 |
| Ribosomal RNA        | 1,644     | 26.2 | 6.6  | 15.8 | 51.4 | 77.6 |
| Transfer RNA         | 1,245     | 30.3 | 6.1  | 15.8 | 47.8 | 78.1 |
| AT-rich region       | 267       | 33.3 | 7.1  | 9.0  | 50.6 | 83.9 |

**Table S4:**

Nucleotide composition (%) of each protein-coding gene - *W. bancrofti* PNG isolate.

| Gene         | A    | C    | G    | T    | A+T  |
|--------------|------|------|------|------|------|
| <i>nad2</i>  | 15.4 | 4.6  | 19.4 | 60.5 | 75.9 |
| <i>nad4</i>  | 15.0 | 6.7  | 19.2 | 59.1 | 74.1 |
| <i>cox1</i>  | 19.2 | 11.3 | 20.9 | 48.6 | 67.8 |
| <i>nad6</i>  | 18.3 | 3.5  | 16.3 | 61.8 | 80.1 |
| <i>cob</i>   | 18.8 | 8.6  | 18.6 | 54.0 | 72.8 |
| <i>cox3</i>  | 22.9 | 6.9  | 18.7 | 51.4 | 74.3 |
| <i>nad4L</i> | 16.0 | 3.7  | 15.2 | 65.0 | 81.0 |
| <i>nad1</i>  | 17.0 | 8.0  | 19.2 | 55.9 | 72.9 |
| <i>atp6</i>  | 18.9 | 7.4  | 16.8 | 56.9 | 75.8 |
| <i>cox2</i>  | 22.3 | 9.3  | 20.7 | 47.7 | 70.0 |
| <i>nad3</i>  | 15.4 | 5.3  | 18.4 | 60.8 | 76.2 |
| <i>nad5</i>  | 14.5 | 6.3  | 19.0 | 60.1 | 74.6 |

**Table S5:**

Codon usage (%) reported by codon family for the 12 mt protein-coding genes - PNG *W. bancrofti* isolate.

| Amino acid       | Codon | No. of codons | Codon usage (%) |
|------------------|-------|---------------|-----------------|
| <b>Non-polar</b> |       |               |                 |
| Alanine          | GCN   | 81            | 2.4             |
| Isoleucine       | ATY   | 197           | 5.7             |
| Leucine          | CTN   | 40            | 1.2             |
| Leucine          | TTR   | 418           | 12.1            |
| Methionine       | ATR   | 149           | 4.3             |
| Phenylalanine    | TTY   | 638           | 18.5            |
| Proline          | CCN   | 75            | 2.2             |
| Tryptophan       | TGR   | 73            | 2.1             |
| Valine           | GTN   | 322           | 9.3             |
| Subtotal         |       | 1,993         | 57.8            |
| <b>Polar</b>     |       |               |                 |
| Asparagine       | AAY   | 105           | 3.0             |
| Cysteine         | TGY   | 103           | 3.0             |
| Glutamine        | CAR   | 52            | 1.5             |
| Glycine          | GGN   | 233           | 6.8             |
| Serine           | AGN   | 158           | 4.6             |
| Serine           | TCN   | 171           | 5.0             |
| Threonine        | ACN   | 87            | 2.5             |
| Tyrosine         | TAY   | 227           | 6.6             |
| Subtotal         |       | 1,136         | 33.0            |
| <b>Acidic</b>    |       |               |                 |
| Aspartate        | GAY   | 84            | 2.4             |
| Glutamate        | GAR   | 60            | 1.7             |
| Subtotal         |       | 144           | 4.1             |
| <b>Basic</b>     |       |               |                 |
| Arginine         | CGN   | 55            | 1.6             |
| Histidine        | CAY   | 52            | 1.5             |
| Lysine           | AAR   | 70            | 2.0             |
| Subtotal         |       | 177           | 5.1             |
| <b>Total</b>     |       | <b>3,450</b>  | <b>100</b>      |
