# Supplementary material
Source: PubMed Central journal article supplement (PMC3725818)

Figure S1: Secondary Structure intergenic region

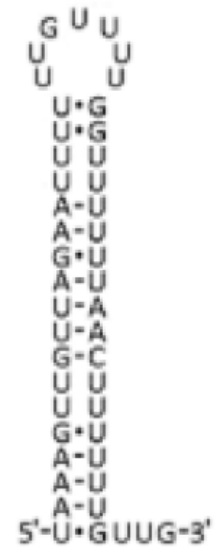

Figure S2: Predicted secondary structure of the 22 transfer RNA genes

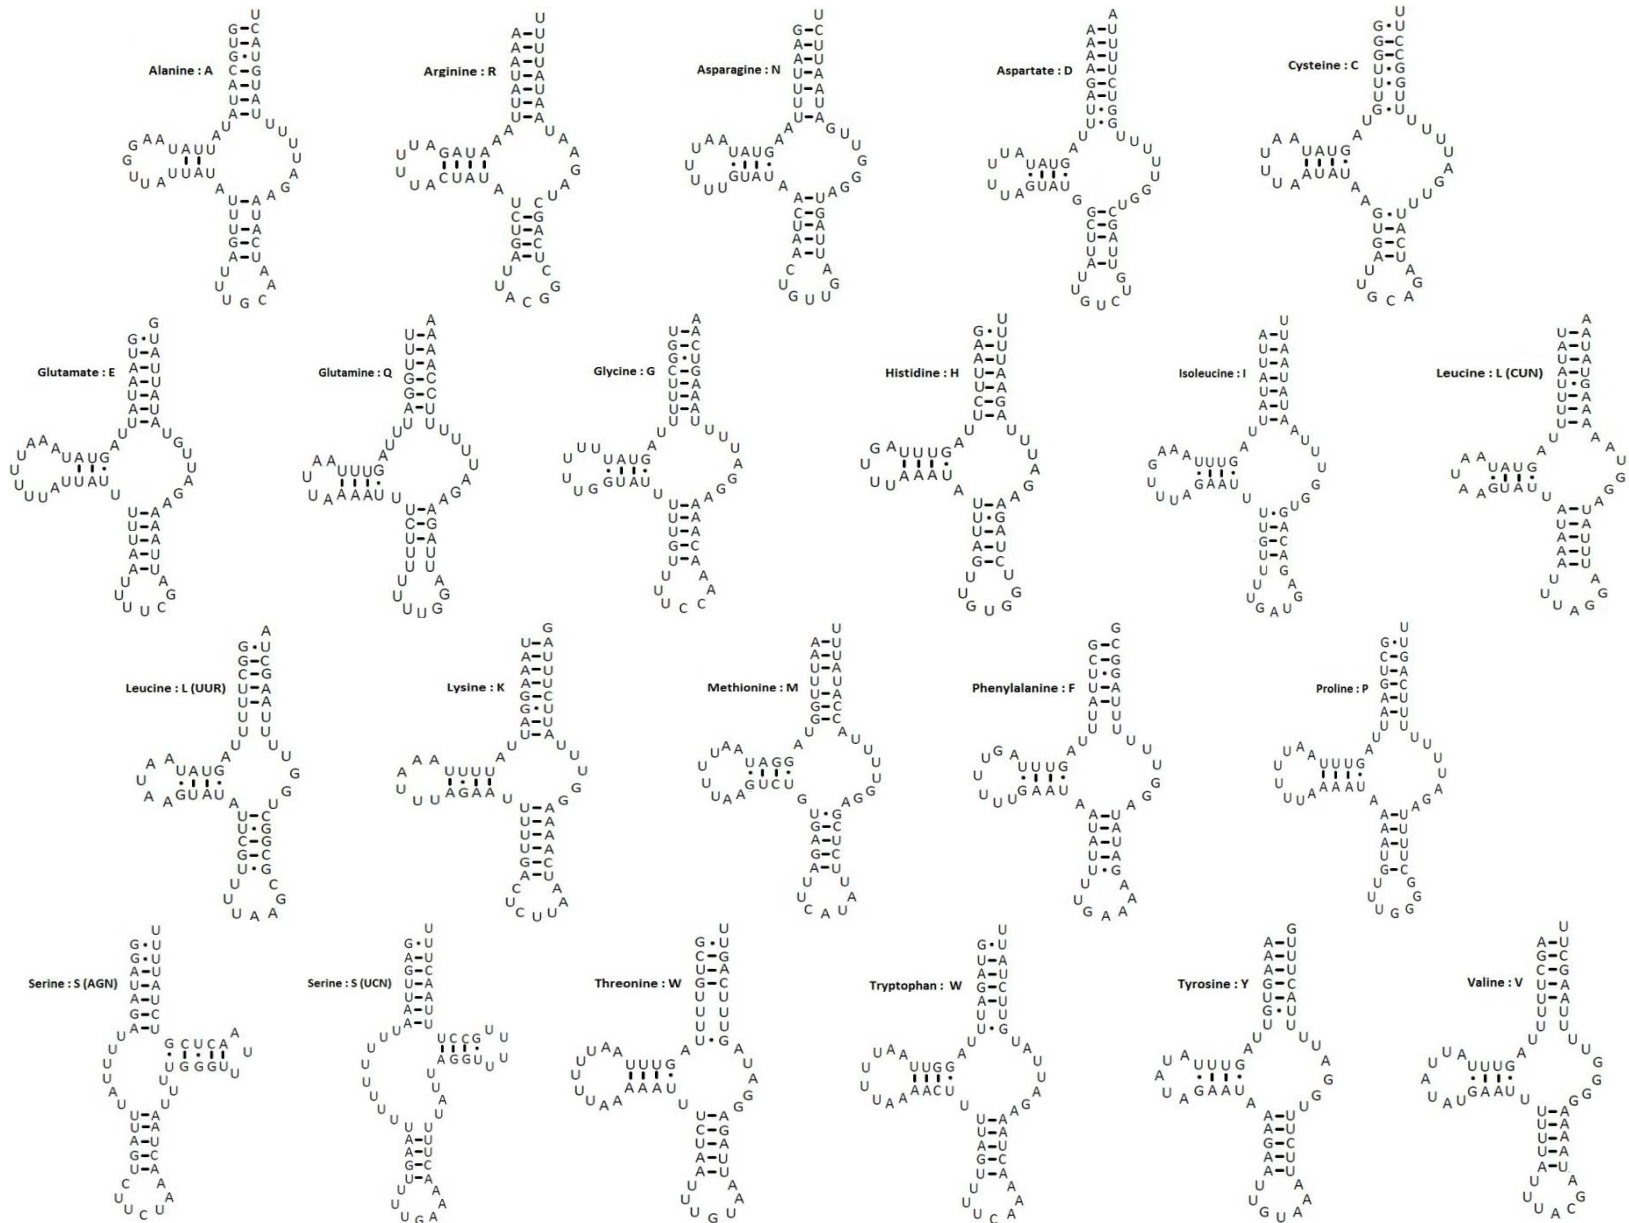



Figure S3b: Secondary Structure 3' half *rrnL* gene

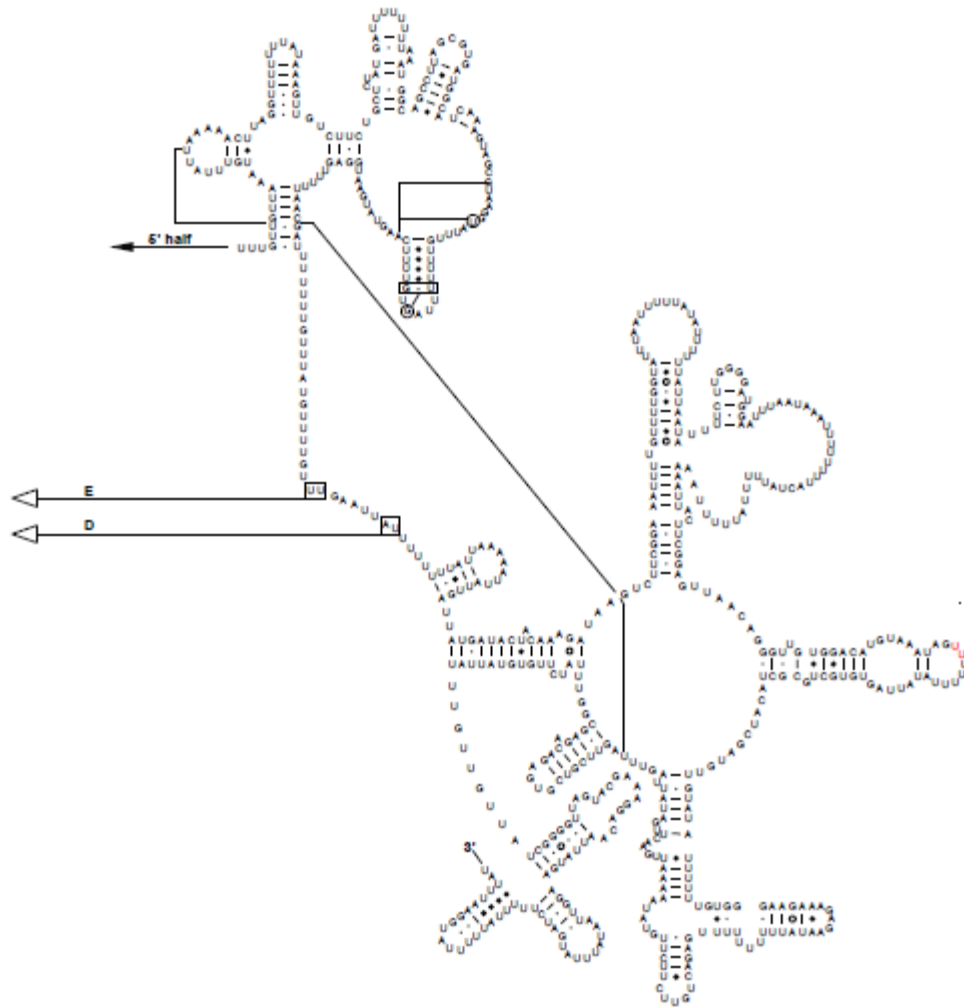

Figure S3c: Secondary Structure 5' half *rrnL* gene

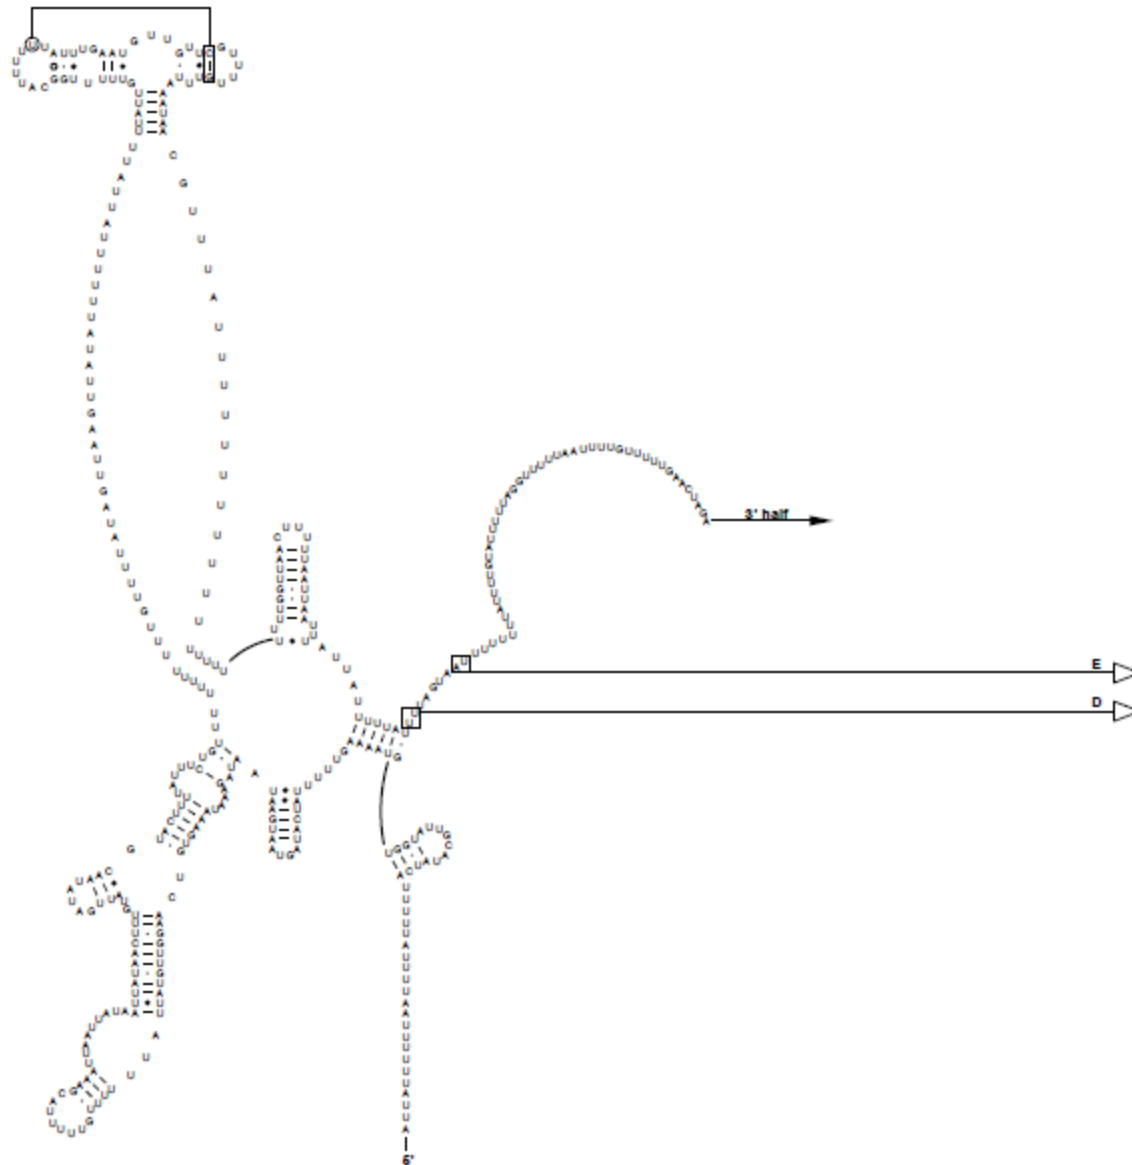

Supplement: NIHMS354428-supplement-02.pdf [file NIHMS354428-supplement-02.pdf]
